# Supplementary material for: An information content approach to diagnosing and improving CLIMCAPS retrievals across instruments and satellites
Source: Copernicus journal article supplement (doi:10.5194/egusphere-2024-2448), 2024-09-12
Supplement: Supplementary file 1 [file egusphere-2024-2448-supplement.pdf]

**Table S1: Summary of instrument differences relevant to CLIMCAPS retrievals.**

|                                                          | <b>Aqua</b>                                                                                                                                                                                                                           | <b>SNPP, JPSS+</b>                                                                                                                | <b>Notes</b>                                                                                                                      |
|----------------------------------------------------------|---------------------------------------------------------------------------------------------------------------------------------------------------------------------------------------------------------------------------------------|-----------------------------------------------------------------------------------------------------------------------------------|-----------------------------------------------------------------------------------------------------------------------------------|
| IR Instrument type                                       | AIRS is a grating spectrometer <sup>1</sup>                                                                                                                                                                                           | CrIS is an interferometer <sup>2</sup>                                                                                            | <sup>1</sup> (Aumann et al., 2003; Pagano et al., 2003)<br><sup>2</sup> (Glumb et al., 2002; Strow et al., 2013)8/8/24 7:34:00 AM |
| Retrieval field-of-regard (FOR) (324,000 per day)        | FOR = 3 x 3 IR FOVs acquired one at a time, and 1 x MW FOV                                                                                                                                                                            | FOR = 3 x 3 IR FOVs acquired simultaneously, and 3 x 3 MW FOVs the size of an IR FOV                                              | FOV = field of view<br>MW = microwave instrument, AMSU on Aqua and ATMS on SNPP, JPSS+                                            |
| FOR alignment                                            | Equally sized along each scanning track                                                                                                                                                                                               | Rotated ~45° at edge of scan (EoS)                                                                                                | SNPP CrIS: EoS corner FOVs of FOR become side FORs and overlap adjacent FORs                                                      |
| Spectral sampling                                        | $\nu/2400$                                                                                                                                                                                                                            | $0.625 \text{ cm}^{-1}$                                                                                                           | = 0.5/L                                                                                                                           |
| Unapodized resolution                                    | n/a                                                                                                                                                                                                                                   | $0.75 \text{ cm}^{-1}$                                                                                                            | SNPP CrIS: FWHM of sinc() = 0.6034/L                                                                                              |
| Apodized resolution                                      | $\nu/1200$                                                                                                                                                                                                                            | $1.135 \text{ cm}^{-1}$                                                                                                           | SNPP CrIS: Hamming = 0.9076/L                                                                                                     |
| $700 \text{ cm}^{-1}$ : FWHM, NEdT(250 K)                | $0.58 \text{ cm}^{-1}$ , 0.23 K                                                                                                                                                                                                       | $1.135 \text{ cm}^{-1}$ , 0.05 K                                                                                                  | FWHM: full width half maximum<br>SNPP CrIS: Apodized                                                                              |
| $1400 \text{ cm}^{-1}$ : FWHM, NEdT(250 K)               | $1.17 \text{ cm}^{-1}$ , 0.08 K                                                                                                                                                                                                       | $1.135 \text{ cm}^{-1}$ , 0.07 K                                                                                                  | SNPP CrIS: Apodized                                                                                                               |
| $2400 \text{ cm}^{-1}$ : FWHM, NEdT(250 K)               | $2.00 \text{ cm}^{-1}$ , 0.14 K                                                                                                                                                                                                       | $1.135 \text{ cm}^{-1}$ , 0.50 K                                                                                                  | SNPP CrIS: Apodized                                                                                                               |
| Spectral noise correlation                               | AIRS has 17 detector arrays: each cluster of ~130 channels are correlated by ~50% (see below). Future work should focus on adding this spectral correlation to the measurement error covariance matrix for a more accurate depiction. | Apodization correlates adjacent (+/-1) channels by 62.51%, +/-2 channels by 13.31% and reduces random noise by 1.586 <sup>3</sup> | <sup>3</sup> (Barnet et al., 2000)                                                                                                |
| Spatial correlation between FOVs in a cloud clearing FOR | Adjacent FOVs are formed by binning and they overlap by ~9% along scan <sup>4</sup> .                                                                                                                                                 | FOVs are independent                                                                                                              | (Pagano et al., 2015)                                                                                                             |

|                                                                              |                                                                                                                                                                                                                         |                                                                                                                                                                                                                         |                                                                                                                                                                                                                                                                                                                                                                                                                 |
|------------------------------------------------------------------------------|-------------------------------------------------------------------------------------------------------------------------------------------------------------------------------------------------------------------------|-------------------------------------------------------------------------------------------------------------------------------------------------------------------------------------------------------------------------|-----------------------------------------------------------------------------------------------------------------------------------------------------------------------------------------------------------------------------------------------------------------------------------------------------------------------------------------------------------------------------------------------------------------|
| Channel spatial co-registration                                              | Parameter called "Cij" quantifies this error in AIRS. We avoid selecting channels where $C_{ij} < 0.9$ , but in the future may consider using overlapping channels by ignoring only those FOV's impacted by Cij errors. | Parameter called encircled energy quantifies this error in CrIS. Centroid of 3 bands should be within 1.4%. This is a systematic (or ~230 microradians) error. Note: all channels in a band have the same displacement. | This estimate quantifies whether channels see same scene on Earth. Its impact on the IR measurements is zero for a uniform scene but is a strong function of sub-pixel structure - especially when high, cold clouds are present.<br>Cij is a random error in AIRS<br>CrIS channel errors are not random.                                                                                                       |
| SARTA forward model <sup>5</sup>                                             | Based on HITRAN <sup>6</sup> 2008 with frequency interpolation across 3 RTA's with different assumed offsets between entrance filter and detector instrument-line-functions                                             | Based on HITRAN <sup>7</sup> 2012                                                                                                                                                                                       | CrIS frequencies are calibrated by internal metrology laser. AIRS has spectral drifts but are corrected by a lookup table. Both still have a small, uncorrected Doppler shift error.<br><sup>5</sup> Standalone AIRS Radiative Transfer Algorithm (Strow et al., 2003)<br><sup>6</sup> High-resolution transmission molecular absorption database (Rothman et al., 2009)<br><sup>7</sup> (Rothman et al., 2013) |
| SARTA tuning                                                                 | 1) Transmittance tuning with respect to dedicated radiosondes and built into a SARTA delivery<br>2) Residual radiance tuning with respect to dedicated radiosondes (typically this is very small).                      | Radiance tuning with respect to ECMWF <sup>8</sup>                                                                                                                                                                      | Transmittance tuning is tedious work and requires experienced staff, but this work is rarely funded or prioritized nowadays. This means that upgrades to SARTA tuning often lag behind retrieval system upgrades.<br><sup>8</sup> European Centre for Medium-Range Weather Forecasts reanalysis model (e.g., Bonavita et al., 2016; Molteni et al., 1996; Rabier et al., 2007)                                  |
| Radiance error as a function of spectroscopy as well as SARTA fitting errors | Residual with respect to dedicated radiosondes, collocated ECMWF and (~0.05K)                                                                                                                                           | V2: SDV (obs-ECM), ~0.5K<br>V3: set to zero                                                                                                                                                                             | A combined estimate of the HITRAN spectroscopy error and SARTA fitting error. The latter is derived empirically from a comparison of calculated and measured radiances. Ideally, this error estimate should also include systematic instrument errors, but historically not provided by the Level-1 teams.                                                                                                      |

Table S2: CLIMCAPS V2 channel subsets for CrIS and AIRS.

|                                                                                                                                                                                                                                                          | CrIS FSR                                                                                                                                                                                                                                                                                                                                                                                                                                                                                                                                                                                                                                                                                                                                                                                                                                                                                                                                                                                                                                                                                                                                                                                                                                                                                                                                                                   | AIRS                                                                                                                                                                                                                                                                                                                                                                                                                                                                                                                                                                                                                                                                                                                                                                                                                                                                                                                                                                                                                                                                                                                                                                                                                                                                                                                                                                                                                                                                                                                                    |
|----------------------------------------------------------------------------------------------------------------------------------------------------------------------------------------------------------------------------------------------------------|----------------------------------------------------------------------------------------------------------------------------------------------------------------------------------------------------------------------------------------------------------------------------------------------------------------------------------------------------------------------------------------------------------------------------------------------------------------------------------------------------------------------------------------------------------------------------------------------------------------------------------------------------------------------------------------------------------------------------------------------------------------------------------------------------------------------------------------------------------------------------------------------------------------------------------------------------------------------------------------------------------------------------------------------------------------------------------------------------------------------------------------------------------------------------------------------------------------------------------------------------------------------------------------------------------------------------------------------------------------------------|-----------------------------------------------------------------------------------------------------------------------------------------------------------------------------------------------------------------------------------------------------------------------------------------------------------------------------------------------------------------------------------------------------------------------------------------------------------------------------------------------------------------------------------------------------------------------------------------------------------------------------------------------------------------------------------------------------------------------------------------------------------------------------------------------------------------------------------------------------------------------------------------------------------------------------------------------------------------------------------------------------------------------------------------------------------------------------------------------------------------------------------------------------------------------------------------------------------------------------------------------------------------------------------------------------------------------------------------------------------------------------------------------------------------------------------------------------------------------------------------------------------------------------------------|
|                                                                                                                                                                                                                                                          | Channel wavenumbers [cm <sup>-1</sup> ] for all CLIMCAPS retrieval parameters                                                                                                                                                                                                                                                                                                                                                                                                                                                                                                                                                                                                                                                                                                                                                                                                                                                                                                                                                                                                                                                                                                                                                                                                                                                                                              |                                                                                                                                                                                                                                                                                                                                                                                                                                                                                                                                                                                                                                                                                                                                                                                                                                                                                                                                                                                                                                                                                                                                                                                                                                                                                                                                                                                                                                                                                                                                         |
| <p><b>air_temp</b></p> <p>Temperature [air_temp] is retrieved in two steps (once before and once after water vapor [h2o_vap_mo1_lay]); freqtemp2 is added to freqtemp after the h2o_vap_mo1_lay retrieval.</p> <p>Subsets from LW + MW + SW IR bands</p> | <p>nchtemp = 105</p> <p>freqtemp = [666.250, 667.500, 668.750, 669.375, 670.000, 672.500, 681.250, 687.500, 688.750, 689.375, 690.000, 691.250, 692.500, 693.750, 695.000, 696.250, 697.500, 698.750, 699.375, 700.000, 701.250, 702.500, 703.750, 704.375, 706.250, 707.500, 708.750, 710.000, 711.250, 712.500, 715.625, 717.500, 718.130, 718.750, 720.000, 721.250, 721.875, 723.130, 723.750, 724.380, 726.250, 726.875, 727.500, 728.125, 731.875, 734.375, 735.000, 738.125, 740.000, 741.875, 743.125, 745.625, 747.500, 749.380, 2198.750, 2201.875, 2207.500, 2220.000, 2222.500, 2224.375, 2255.000, 2260.000, 2263.750, 2266.250, 2270.000, 2272.500, 2277.500, 2280.000, 2282.500, 2285.000, 2287.500, 2292.500, 2293.750, 2295.625, 2297.500, 2303.125, 2305.000, 2307.500, 2312.500, 2316.875, 2380.000, 2380.625, 2381.250, 2381.875, 2382.500, 2383.125, 2383.750, 2384.375, 2385.000, 2385.630, 2386.250, 2386.875, 2387.500, 2388.125, 2388.750, 2389.375, 2390.000, 2390.625, 2391.250, 2391.875, 2392.500, 2393.125, 2393.750, 2405.000, 2412.500]</p> <p>nchtemp2 = 26</p> <p>freqtemp2 = [779.380, 784.380, 794.375, 796.880, 798.130, 799.375, 800.625, 803.750, 815.000, 816.250, 826.875, 928.750, 945.000, 952.500, 1398.750, 1406.250, 1471.880, 1476.250, 1498.130, 1555.630, 1559.380, 1700.000, 1730.000, 1732.500, 1733.750, 1736.250]</p> | <p>nchtemp = 134</p> <p>freqtemp = [664.510, 666.270, 666.770, 667.280, 668.540, 668.790, 669.050, 669.560, 669.810, 670.070, 670.570, 672.110, 681.470, 689.490, 689.760, 691.120, 691.390, 692.760, 693.030, 694.400, 694.670, 696.050, 697.710, 698.820, 699.100, 699.660, 700.780, 701.060, 702.460, 702.740, 703.870, 704.440, 706.140, 706.990, 707.850, 708.710, 709.570, 711.000, 711.290, 712.740, 713.030, 714.190, 714.480, 715.650, 717.410, 717.990, 718.290, 718.580, 718.880, 719.170, 719.470, 719.760, 720.060, 720.350, 720.650, 720.950, 721.540, 721.804, 723.030, 723.330, 724.520, 2199.750, 2202.510, 2207.140, 2220.180, 2222.060, 2224.880, 2255.390, 2260.230, 2262.180, 2267.050, 2269.980, 2272.920, 2277.830, 2279.810, 2282.770, 2284.750, 2287.730, 2292.700, 2294.700, 2297.700, 2302.510, 2305.240, 2307.760, 2312.530, 2317.110, 2322.640, 2325.060, 2330.040, 2332.830, 2337.500, 2342.180, 2347.830, 2357.300, 2358.260, 2359.210, 2360.160, 2361.120, 2362.070, 2363.030, 2363.980, 2364.940, 2365.900, 2366.860, 2367.820, 2368.780, 2369.740, 2370.700, 2371.660, 2372.630, 2373.590, 2374.560, 2375.520, 2376.490, 2377.460, 2378.430, 2379.390, 2382.310, 2383.280, 2384.250, 2385.230, 2386.200, 2387.180, 2388.150, 2389.130, 2390.110, 2391.090, 2392.070, 2393.050, 2394.030, 2395.010, 2397.960, 2404.880, 2412.830]</p> <p>nchtemp2 = 12</p> <p>freqtemp2 = [1330.370, 1335.210, 1340.200, 1367.250, 1376.890, 1381.210, 1397.130, 1407.770, 1468.830, 1479.360, 1502.170, 1551.300]</p> |
| <p><b>h2o_vap</b></p> <p>Water vapor [h2o_vap_mo1_lay] subset from LW + MW IR bands</p>                                                                                                                                                                  | <p>nchwatr = 66</p> <p>freqwatr = [779.380, 784.380, 794.375, 796.880, 798.130, 799.375, 800.625, 803.750, 815.000, 816.250, 826.875, 928.750, 945.000, 952.500, 1091.250, 1213.130, 1310.000, 1315.000, 1320.000, 1330.630, 1335.000, 1345.000, 1357.500, 1367.500, 1381.880, 1384.380, 1386.880, 1393.750, 1395.000, 1397.500, 1398.750, 1400.000, 1401.250, 1403.130, 1406.250, 1407.500, 1410.000,</p>                                                                                                                                                                                                                                                                                                                                                                                                                                                                                                                                                                                                                                                                                                                                                                                                                                                                                                                                                                 | <p>nchwatr = 46</p> <p>freqwatr = [753.700, 755.000, 768.880, 769.900, 776.360, 778.080, 779.110, 793.890, 795.680, 798.920, 803.650, 839.920, 849.570, 948.180, 1121.000, 1135.540, 1218.500, 1225.140, 1310.180, 1315.470, 1324.970, 1367.250, 1376.890, 1381.210, 1392.150, 1397.130, 1407.770, 1410.600, 1422.030, 1427.230, 1432.470, 1441.890, 1462.090, 1468.830, 1479.360, 1483.740, 1493.210,</p>                                                                                                                                                                                                                                                                                                                                                                                                                                                                                                                                                                                                                                                                                                                                                                                                                                                                                                                                                                                                                                                                                                                              |

|                                                                       |                                                                                                                                                                                                                                                                                                                                                                                                                                                                                                                                                                                                                                                                                                                                                                                                                                                                                                   |                                                                                                                                                                                                                                                                                                                                                                                                                                                                                                                                                                                                                                                                                                     |
|-----------------------------------------------------------------------|---------------------------------------------------------------------------------------------------------------------------------------------------------------------------------------------------------------------------------------------------------------------------------------------------------------------------------------------------------------------------------------------------------------------------------------------------------------------------------------------------------------------------------------------------------------------------------------------------------------------------------------------------------------------------------------------------------------------------------------------------------------------------------------------------------------------------------------------------------------------------------------------------|-----------------------------------------------------------------------------------------------------------------------------------------------------------------------------------------------------------------------------------------------------------------------------------------------------------------------------------------------------------------------------------------------------------------------------------------------------------------------------------------------------------------------------------------------------------------------------------------------------------------------------------------------------------------------------------------------------|
|                                                                       | 1412.500, 1415.000, 1416.250, 1417.500, 1421.880, 1424.380, 1426.250, 1427.500, 1428.750, 1430.000, 1435.000, 1438.130, 1442.500, 1468.130, 1471.880, 1476.250, 1498.130, 1555.630, 1559.380, 1575.000, 1585.630, 1605.000, 1685.630, 1700.000, 1730.000, 1732.500, 1733.750, 1736.250, 1745.000]                                                                                                                                                                                                                                                                                                                                                                                                                                                                                                                                                                                                 | 1502.170, 1513.830, 1547.200, 1551.300, 1572.090, 1586.260, 1592.710, 1598.490, 1605.050]                                                                                                                                                                                                                                                                                                                                                                                                                                                                                                                                                                                                           |
| <b>O<sub>3</sub></b><br>Ozone [o3_mol_lay] subset from LW IR band     | nchozon = 77<br>freqozon = [996.875, 997.500, 998.125, 999.380, 1000.000, 1000.630, 1001.880, 1002.500, 1003.130, 1005.000, 1005.630, 1007.500, 1008.130, 1010.000, 1011.880, 1012.500, 1013.130, 1014.380, 1015.000, 1015.630, 1016.250, 1016.880, 1018.130, 1018.750, 1019.380, 1020.000, 1020.630, 1021.250, 1021.880, 1022.500, 1023.130, 1023.750, 1024.380, 1025.000, 1025.630, 1026.250, 1026.880, 1028.750, 1031.250, 1031.880, 1032.500, 1033.130, 1033.750, 1034.380, 1035.000, 1035.630, 1036.250, 1036.880, 1037.500, 1038.130, 1038.750, 1040.630, 1041.250, 1041.880, 1045.630, 1047.500, 1048.130, 1049.380, 1050.000, 1050.630, 1051.250, 1051.880, 1053.130, 1053.750, 1054.380, 1055.630, 1056.250, 1056.880, 1057.500, 1058.130, 1058.750, 1060.000, 1060.630, 1061.250, 1063.750, 1066.250, 1068.130]                                                                         | nchozon = 40<br>freqozon = [997.11, 998.39, 999.67, 1001.38, 1003.54, 1005.26, 1006.56, 1008.30, 1010.48, 1011.79, 1013.11, 1014.87, 1016.64, 1018.41, 1020.63, 1021.97, 1023.31, 1024.21, 1024.66, 1025.11, 1025.56, 1026.46, 1026.91, 1027.36, 1028.26, 1028.71, 1029.62, 1030.07, 1030.53, 1030.98, 1031.44, 1061.33, 1061.81, 1062.29, 1063.26, 1064.22, 1064.70, 1065.19, 1068.58, 1069.07]                                                                                                                                                                                                                                                                                                    |
| <b>CH<sub>4</sub></b><br>Methane [ch4_mol_lay] subset from MW IR band | nchch4 = 84<br>freqch4 = [1220.000, 1228.750, 1229.380, 1230.000, 1236.250, 1237.500, 1238.750, 1241.250, 1242.500, 1245.630, 1246.250, 1246.880, 1247.500, 1250.000, 1252.500, 1253.130, 1253.750, 1255.000, 1256.250, 1260.000, 1261.250, 1261.880, 1262.500, 1263.130, 1263.750, 1265.000, 1265.630, 1267.500, 1268.130, 1268.750, 1269.380, 1270.000, 1271.250, 1275.000, 1275.630, 1276.250, 1276.880, 1277.500, 1281.250, 1281.880, 1282.500, 1283.130, 1283.750, 1287.500, 1288.130, 1288.750, 1290.000, 1292.500, 1294.380, 1295.000, 1296.250, 1297.500, 1300.000, 1301.250, 1301.880, 1302.500, 1303.130, 1303.750, 1304.380, 1305.000, 1305.630, 1306.250, 1307.500, 1311.250, 1312.500, 1316.880, 1317.500, 1321.250, 1321.880, 1322.500, 1327.500, 1328.750, 1332.500, 1337.500, 1341.250, 1342.500, 1346.250, 1346.880, 1347.500, 1351.250, 1355.630, 1356.250, 1360.630, 1365.630] | nchch4 = 65<br>freqch4 = [1220.020, 1228.230, 1229.780, 1236.020, 1236.540, 1237.060, 1237.590, 1238.110, 1238.630, 1240.740, 1241.260, 1241.790, 1242.320, 1242.850, 1244.960, 1245.490, 1246.020, 1247.090, 1247.620, 1248.150, 1249.750, 1252.970, 1253.500, 1254.040, 1254.580, 1255.120, 1256.730, 1259.440, 1261.070, 1261.610, 1262.160, 1267.630, 1268.180, 1268.730, 1270.930, 1271.480, 1287.740, 1288.300, 1288.870, 1294.560, 1296.850, 1297.430, 1298.000, 1299.730, 1302.040, 1302.610, 1303.190, 1303.770, 1304.350, 1306.100, 1306.680, 1321.990, 1322.580, 1326.770, 1327.370, 1332.180, 1341.220, 1341.730, 1342.240, 1342.750, 1346.340, 1347.370, 1355.150, 1355.670, 1356.190] |
| <b>CO</b>                                                             | nchco = 35                                                                                                                                                                                                                                                                                                                                                                                                                                                                                                                                                                                                                                                                                                                                                                                                                                                                                        | nchco = 36                                                                                                                                                                                                                                                                                                                                                                                                                                                                                                                                                                                                                                                                                          |

|                                                                               |                                                                                                                                                                                                                                                                                                                                                                                                                                                                                                                                                                       |                                                                                                                                                                                                                                                                                                                                                                                                                                                                                                                                                                                                                                                                         |
|-------------------------------------------------------------------------------|-----------------------------------------------------------------------------------------------------------------------------------------------------------------------------------------------------------------------------------------------------------------------------------------------------------------------------------------------------------------------------------------------------------------------------------------------------------------------------------------------------------------------------------------------------------------------|-------------------------------------------------------------------------------------------------------------------------------------------------------------------------------------------------------------------------------------------------------------------------------------------------------------------------------------------------------------------------------------------------------------------------------------------------------------------------------------------------------------------------------------------------------------------------------------------------------------------------------------------------------------------------|
| Carbon monoxide<br>[co_mol_lay]<br>subset from SW IR<br>band                  | freqco = [2155.000, 2157.500, 2158.130,<br>2158.750, 2159.380, 2160.000, 2161.880,<br>2162.500, 2164.380, 2165.000, 2165.630,<br>2166.250, 2167.500, 2168.750, 2169.380,<br>2170.000, 2170.630, 2172.500, 2173.130,<br>2174.380, 2175.000, 2176.250, 2176.880,<br>2177.500, 2178.130, 2179.380, 2180.000,<br>2182.500, 2183.130, 2185.000, 2186.880,<br>2187.500, 2188.750, 2190.000, 2191.250]                                                                                                                                                                       | freqco = [2181.490, 2182.400, 2183.310,<br>2184.210, 2185.120, 2186.030, 2186.940,<br>2187.850, 2188.760, 2189.670, 2190.580,<br>2191.500, 2192.410, 2193.330, 2194.240,<br>2195.160, 2196.070, 2196.990, 2197.910,<br>2198.830, 2199.750, 2200.670, 2201.590,<br>2202.510, 2203.440, 2204.360, 2205.290,<br>2206.210, 2207.140, 2208.990, 2212.710,<br>2213.640, 2214.570, 2215.500, 2216.440,<br>2221.120]                                                                                                                                                                                                                                                            |
| CO <sub>2</sub><br>Carbon dioxide [co2_vmr] subset<br>from LW+MW IR bands     | nchco2 = 54 [96]<br>freqco2 = [666.250, 667.500, 668.750,<br>669.375, 670.000, 672.500, 681.250, 687.500,<br>688.750, 689.375, 690.000, 691.250, 692.500,<br>693.750, 695.000, 696.250, 697.500, 698.750,<br>699.375, 700.000, 701.250, 702.500, 703.750,<br>704.375, 706.250, 707.500, 708.750, 710.000,<br>711.250, 712.450, 715.625, 717.500, 718.130,<br>718.750, 720.000, 721.250, 721.875, 723.130,<br>723.750, 724.380, 726.250, 726.875, 727.500,<br>728.125, 731.875, 734.375, 735.000, 738.125,<br>740.000, 741.875, 743.125, 745.625, 747.500,<br>749.380] | nchco2 = 61<br>freqco2 = [712.450, 712.740, 714.190, 714.480,<br>715.650, 715.940, 716.230, 717.410, 721.840,<br>722.140, 722.430, 724.220, 724.520, 724.820,<br>725.120, 725.720, 726.020, 726.330, 726.630,<br>727.530, 727.830, 728.960, 729.270, 729.570,<br>730.480, 730.790, 731.090, 731.390, 732.310,<br>732.620, 733.540, 733.840, 735.070, 735.380,<br>736.930, 737.550, 738.170, 738.480, 738.790,<br>740.040, 742.860, 743.480, 744.750, 745.060,<br>745.700, 746.330, 747.600, 749.200, 749.520,<br>749.840, 750.480, 750.800, 751.770, 752.730,<br>753.060, 754.350, 755.980, 757.610, 791.750,<br>792.100, 2385.230]                                     |
| N <sub>2</sub> O<br>Nitrous oxide [n2o_mol_lay]<br>subset from LW+SW IR bands | nchn2o = 21<br>freqn2o = [1274.380, 1275.000, 1275.630,<br>1276.250, 1276.880, 1277.500, 1278.130,<br>1278.750, 1279.380, 1281.880, 1282.500,<br>1285.000, 1285.630, 1291.880, 1292.500,<br>1295.630, 1296.250, 1298.130, 1298.750,<br>1299.380, 1300.630]                                                                                                                                                                                                                                                                                                            | nchn2o = 58<br>freqn2o = [1291.140, 1291.710, 1292.280,<br>1292.850, 1293.420, 1293.990, 1295.710,<br>1298.580, 1299.150, 1300.880, 2181.490,<br>2182.400, 2183.310, 2184.210, 2185.120,<br>2186.030, 2186.940, 2187.850, 2188.760,<br>2189.670, 2190.580, 2191.500, 2192.410,<br>2193.330, 2194.240, 2195.160, 2196.070,<br>2196.990, 2197.910, 2198.830, 2199.750,<br>2200.670, 2201.590, 2202.510, 2203.440,<br>2204.360, 2205.290, 2206.210, 2207.140,<br>2208.060, 2208.990, 2209.920, 2210.850,<br>2211.780, 2212.710, 2213.640, 2214.570,<br>2215.500, 2216.440, 2217.370, 2218.310,<br>2219.240, 2220.180, 2221.120, 2222.060,<br>2223.000, 2223.940, 2224.880] |
| HNO <sub>3</sub><br>Nitric acid [hno3_mol_lay]<br>subset from<br>LW+MW bands  | nchhno3 = 30<br>freqhno3 = [846.250, 847.500, 851.250,<br>855.625, 857.500, 858.125, 860.625, 861.875,<br>862.500, 867.500, 869.375, 873.125, 875.000,<br>876.875, 880.000, 881.875, 885.625, 893.125,<br>894.375, 895.625, 898.750, 900.000, 901.250,<br>902.500, 904.375, 907.500, 911.250, 912.500,<br>920.000, 923.125]                                                                                                                                                                                                                                           | nchhno3 = 14<br>freqhno3 = [762.870, 878.440, 878.770,<br>879.090, 885.050, 887.380, 888.390, 888.730,<br>895.500, 895.840, 896.530, 1324.970, 1325.570,<br>1326.17]                                                                                                                                                                                                                                                                                                                                                                                                                                                                                                    |
| SO <sub>2</sub>                                                               | nchso2 = 31<br>freqso2 = [1345.000, 1350.000, 1352.500,<br>1354.380, 1357.500, 1358.750, 1359.380,<br>1360.000, 1360.630, 1361.250, 1361.880,                                                                                                                                                                                                                                                                                                                                                                                                                         | nchso2 = 60<br>freqso2 = [1343.260, 1343.770, 1344.290,<br>1344.800, 1345.310, 1345.830, 1346.850,<br>1347.370, 1347.890, 1348.400, 1348.920,                                                                                                                                                                                                                                                                                                                                                                                                                                                                                                                           |

|                            |                                                                                                                                                                                                                                                                                                                                                                                                                                                                                                                                                                                                                                                                                     |                                                                                                                                                                                                                                                                                                                                                                                                                                                                                                                                                                     |
|----------------------------|-------------------------------------------------------------------------------------------------------------------------------------------------------------------------------------------------------------------------------------------------------------------------------------------------------------------------------------------------------------------------------------------------------------------------------------------------------------------------------------------------------------------------------------------------------------------------------------------------------------------------------------------------------------------------------------|---------------------------------------------------------------------------------------------------------------------------------------------------------------------------------------------------------------------------------------------------------------------------------------------------------------------------------------------------------------------------------------------------------------------------------------------------------------------------------------------------------------------------------------------------------------------|
|                            | 1362.500, 1367.500, 1370.000, 1370.630, 1371.250, 1371.880, 1372.500, 1374.380, 1375.000, 1375.630, 1376.250, 1376.880, 1377.500, 1379.380, 1380.000, 1381.880, 1382.500, 1383.750, 1384.380, 1385.00]                                                                                                                                                                                                                                                                                                                                                                                                                                                                              | 1349.430, 1349.950, 1350.470, 1350.990, 1351.510, 1352.540, 1353.060, 1353.580, 1354.100, 1354.620, 1356.190, 1356.710, 1357.240, 1357.760, 1358.280, 1358.810, 1359.330, 1359.860, 1360.380, 1361.430, 1361.960, 1366.720, 1367.250, 1367.780, 1368.320, 1368.850, 1369.380, 1369.910, 1370.450, 1370.980, 1371.520, 1372.050, 1372.590, 1373.120, 1373.660, 1374.200, 1374.730, 1375.270, 1375.810, 1376.350, 1376.890, 1377.430, 1377.970, 1378.510, 1379.050, 1379.590, 1380.130, 1380.670, 1381.210]                                                           |
| <b>Surface temperature</b> | nchsurf = 66<br>freqsurf = [789.375, 790.625, 823.750, 833.750, 843.750, 845.000, 899.375, 901.875, 904.375, 907.500, 911.250, 912.500, 916.250, 920.000, 927.500, 933.750, 935.625, 937.500, 939.375, 943.125, 946.250, 951.875, 956.250, 957.500, 962.500, 968.750, 980.000, 985.000, 1093.130, 1095.000, 1231.250, 1234.380, 2461.880, 2463.130, 2464.380, 2465.000, 2470.630, 2472.500, 2476.250, 2481.250, 2485.000, 2486.880, 2488.750, 2490.630, 2492.500, 2495.000, 2496.880, 2498.130, 2499.380, 2501.250, 2503.750, 2505.630, 2507.500, 2510.000, 2513.750, 2516.880, 2518.750, 2521.250, 2523.130, 2525.000, 2527.500, 2531.880, 2535.630, 2540.000, 2541.880, 2543.130] | nchsurf = 54<br>freqsurf = [759.570, 801.100, 810.670, 811.780, 817.800, 820.830, 830.080, 833.990, 843.910, 847.140, 857.360, 861.110, 863.630, 869.040, 872.580, 877.460, 880.410, 885.380, 890.750, 895.500, 899.620, 903.080, 913.010, 917.310, 918.750, 927.860, 939.420, 963.840, 972.670, 986.160, 997.530, 1003.970, 1071.020, 1092.420, 1103.170, 1114.640, 1122.600, 1131.200, 1227.190, 1234.450, 2400.920, 2410.840, 2420.840, 2449.270, 2456.480, 2464.760, 2472.060, 2482.560, 2492.080, 2500.600, 2510.260, 2522.160, 2527.600, 2555.180]            |
| <b>Surface reflectance</b> | nchrhset = 33<br>freqrhset = [2395.000, 2397.500, 2400.000, 2402.500, 2405.000, 2407.500, 2410.000, 2412.500, 2415.000, 2417.500, 2420.000, 2422.500, 2425.000, 2427.500, 2447.500, 2450.000, 2455.000, 2465.000, 2472.500, 2475.000, 2482.500, 2492.500, 2497.500, 2500.000, 2502.500, 2505.000, 2510.000, 2517.500, 2520.000, 2522.500, 2527.500, 2542.500, 2547.500]                                                                                                                                                                                                                                                                                                             | nchrhset = 20<br>freqrhset = [2400.920, 2410.840, 2420.840, 2449.270, 2456.480, 2464.760, 2472.060, 2482.560, 2492.080, 2500.600, 2510.260, 2522.160, 2527.600, 2555.180, 2568.290, 2583.770, 2595.250, 2603.660, 2616.380, 2622.790]                                                                                                                                                                                                                                                                                                                               |
| <b>Cloud clearing</b>      | nchcld = 61<br>freqcld = [701.250, 702.500, 703.750, 704.375, 706.250, 706.880, 707.500, 708.750, 709.380, 711.250, 712.500, 714.380, 715.630, 717.500, 718.130, 718.750, 719.380, 721.250, 721.880, 723.130, 723.750, 724.380, 726.250, 732.500, 734.380, 738.130, 740.000, 741.250, 741.880, 742.500, 746.250, 747.500, 749.380, 750.000, 752.500, 753.130, 755.000, 758.130, 773.130, 790.000, 801.250, 804.380, 806.880, 810.630, 820.630, 847.500, 880.000, 917.500, 937.500, 979.380, 1072.50, 1216.250, 1227.500, 2207.500, 2220.000, 2222.500,                                                                                                                              | nchcld = 62<br>freqcld = [701.340, 702.460, 703.870, 704.440, 706.140, 706.990, 707.560, 708.710, 709.280, 711.290, 712.450, 714.480, 715.650, 717.410, 717.990, 718.880, 719.470, 721.240, 721.840, 723.030, 723.630, 724.520, 726.330, 732.620, 733.840, 738.170, 740.040, 741.290, 741.910, 742.540, 746.330, 747.600, 749.520, 750.160, 753.060, 755.000, 758.260, 773.280, 789.970, 801.100, 804.390, 810.670, 820.450, 847.540, 880.080, 917.670, 939.420, 978.720, 1072.490, 1216.970, 1227.710, 2207.140, 2220.180, 2222.060, 2332.830, 2385.230, 2390.110, |

|                           |                                                                                                                                                                                                                                                                                                                                                                                                                                                                                                                                 |                                                                                                                                                                                                                                                                                                                                                                                                                                                                                                               |
|---------------------------|---------------------------------------------------------------------------------------------------------------------------------------------------------------------------------------------------------------------------------------------------------------------------------------------------------------------------------------------------------------------------------------------------------------------------------------------------------------------------------------------------------------------------------|---------------------------------------------------------------------------------------------------------------------------------------------------------------------------------------------------------------------------------------------------------------------------------------------------------------------------------------------------------------------------------------------------------------------------------------------------------------------------------------------------------------|
|                           | 2332.500, 2385.000, 2390.000, 2395.000, 2405.000]                                                                                                                                                                                                                                                                                                                                                                                                                                                                               | 2395.010, 2397.960, 2404.880, 2412.830, 2420.840]                                                                                                                                                                                                                                                                                                                                                                                                                                                             |
| <b>Cloud top pressure</b> | nchcldhgt = 53<br>freqcldhgt = [701.250, 702.500, 703.750, 704.380, 706.250, 706.880, 707.500, 708.750, 709.380, 711.250, 712.500, 714.380, 715.630, 717.500, 718.130, 718.750, 719.380, 721.250, 721.880, 723.130, 723.750, 724.380, 726.250, 732.500, 734.380, 738.130, 740.000, 741.250, 741.880, 742.500, 746.250, 747.500, 749.380, 750.000, 752.500, 753.130, 755.000, 758.130, 773.130, 790.000, 801.250, 804.380, 806.880, 810.630, 820.630, 847.500, 880.000, 917.500, 937.500, 979.380, 1072.500, 1216.250, 1227.500] | nchcldhgt = 51<br>freqcldhgt = [701.340, 702.460, 703.870, 704.440, 706.140, 706.990, 707.560, 708.710, 709.280, 711.290, 712.450, 714.480, 715.650, 717.410, 717.990, 718.880, 719.470, 721.240, 721.840, 723.030, 723.630, 724.520, 726.330, 732.620, 733.840, 738.170, 740.040, 741.290, 741.910, 742.540, 746.330, 747.600, 749.520, 750.160, 753.060, 755.000, 758.260, 773.280, 789.970, 801.100, 804.390, 810.670, 820.450, 847.540, 880.080, 917.670, 939.420, 978.720, 1072.490, 1216.970, 1227.710] |

5
